1

2

3

4        **Diurnal modulation of multivesicular release controls the**  
5        **efficiency of information transmission at a sensory synapse**

6

7        José Moya-Díaz, Ben James, Federico Esposti, Jamie Johnston and Leon Lagnado\*

8

9                    Sussex Neuroscience, School of Life Sciences, University of Sussex,

10                                                            Brighton BN1 9QG, UK

11

12        \*Corresponding author: [l.lagnado@sussex.ac.uk](mailto:l.lagnado@sussex.ac.uk)

13

14

15        **Summary**

16        Sensory circuits adapt to changes in the external world or the animal's internal  
17        state through the actions of neuromodulators<sup>1,2</sup>. Synapses are key sites at which  
18        neuromodulators act<sup>3,4</sup> but it is not known how they alter the amount of information  
19        transmitted<sup>5</sup>. We investigated this question in the context of the diurnal regulation  
20        of visual processing in larval zebrafish, focusing on ribbon-type synapses of retinal  
21        bipolar cells<sup>6</sup>. We demonstrate that contrast-sensitivity peaks in the afternoon  
22        accompanied by an average four-fold increase in the Shannon information  
23        transmitted at individual active zones. This increase reflects higher synaptic gain,  
24        lower spontaneous "noise", reduced variability of stimulus-evoked release and  
25        improved temporal precision. Simultaneously, an increase in the probability of  
26        multivesicular events with larger information content increases the efficiency of  
27        information transmission (bits per vesicle) by factors of 2-3. The neuromodulator  
28        dopamine contributes to all these changes in synaptic function, although ON and  
29        OFF visual channels are differentially affected. Multivesicular release is a property  
30        of synapses in many parts of the brain<sup>7-11</sup> and this study demonstrates that it's  
31        potentiation by neuromodulators can both increase the amount of information that  
32        is transmitted and the efficiency of transmission, revealing a previously unknown  
33        mechanism for adjusting neural processing.

34

35 It has long been understood that the flow of signals through neural circuits is  
36 adjusted by neuromodulators<sup>1</sup>. Less clear is how these alter the amount of  
37 information that is transmitted through the circuit<sup>3</sup>. Here we investigate this question  
38 in the context of visual processing in the retina.

39 In diurnal animals, the sensitivity of the retina to light is regulated both by the  
40 daily light-dark cycle and by intrinsic circadian clocks<sup>12-15</sup>. But the average  
41 luminance of a visual scene is not the variable driving most behaviours related to  
42 vision: navigation, finding food and avoiding predators all depend on detection of  
43 fast modulations in light intensity. We therefore investigated the diurnal control of  
44 temporal contrast processing, focusing on the visual signal transmitted by  
45 glutamatergic synapses of bipolar cells. These neurons are the bridge between the  
46 photoreceptors and ganglion cells that deliver the results of retinal processing to  
47 downstream circuits<sup>6</sup>. The synaptic compartments of bipolar cells contribute to a  
48 number of processing tasks, from adaptive gain control to temporal filtering and the  
49 coding of motion, colour, orientation and direction<sup>6,16-20</sup>. Bipolar cells, like sensory  
50 hair cells and electroreceptors, contain ribbon structures that supply vesicles to the  
51 active zone<sup>21</sup>. These sensory synapses do not always operate as Poisson machines  
52 in which vesicles are released independently but also signal through multivesicular  
53 release (MVR), where the fusion of two or more vesicles is co-ordinated as a single  
54 synaptic event<sup>8,22,23</sup>. MVR is also a common property of neocortical<sup>9,11</sup>, striatal<sup>10</sup> and  
55 cerebellar<sup>24</sup> synapses.

56

### 57 **Diurnal modulation of contrast-sensitivity and synaptic gain**

58 Using SyGCaMP2<sup>25</sup> we found that synaptic calcium responses to modulations in  
59 light intensity varied during the day and peaked in the subjective afternoon (Fig. 1A-  
60 D). At ZT = 4 hours, temporal contrasts below 50% were barely detected and the  
61 half-maximal response ( $C_{1/2}$ ) was generated by a stimulus contrast of  $86 \pm 2$  % (red

62 traces in Figs. 1B-C). But at ZT = 7 hours  $C_{1/2}$  it fell to  $35 \pm 2 \%$  with responses  
63 saturated above 50%. When  $C_{1/2}$  was mapped during the course of the day it was  
64 relatively constant at ZT 1-5 hours and ZT 9-14 hours but increased to levels ~2.4-  
65 fold lower around ZT = 7 hours (Fig. 1D). Notably, this peak in the contrast  
66 sensitivity of the retinal circuit occurred at a similar *Zeitgeber* time as the maximum  
67 contrast sensitivity measured behaviourally using the optokinetic reflex<sup>13,15</sup>.  
68 Luminance sensitivity was also under diurnal control but with a distinctive time-  
69 course, gradually increasing ~200-fold through the day (Extended Data Figure 1).

70 To measure transmission of the visual signal in terms of its elementary units –  
71 synaptic vesicles - we expressed the reporter iGluSnFR sparsely in bipolar cells<sup>23,26</sup>  
72 (Fig. 1E; see Methods and Extended Data Figure 2). Synaptic function was  
73 compared over a two-hour period beginning 1 hour after light onset (“morning”) with  
74 a two-hour period beginning 6 hours later (“afternoon”; Fig. 1F). We began by  
75 measuring the contrast-response function (CRF) simply as the average number of  
76 vesicles released per cycle of a 5 Hz stimulus. There was notably little diurnal  
77 modulation of the CRF measured at ON synapses (Fig. 1H) but in the OFF channel  
78 the maximum rate of release measured at 100% contrast increased from  $3.05 \pm 0.5$   
79 vesicles/s in the morning to  $5.1 \pm 0.3$  vesicles/s in the afternoon (Fig. 1G). This  
80 increase in synaptic gain was also accompanied by an increase in contrast  
81 sensitivity ( $1/C_{1/2}$ ) and the combined effects were assessed as the derivative of the  
82 CRF (“contrast gain”; Fig. 1I). Contrasts in natural visual scenes rarely exceed  
83 40%<sup>17</sup> and in the morning this range was signalled best through the ON channel.  
84 But in the afternoon the OFF channel became dominant, with contrast gains  
85 increasing by factors of 2-6.

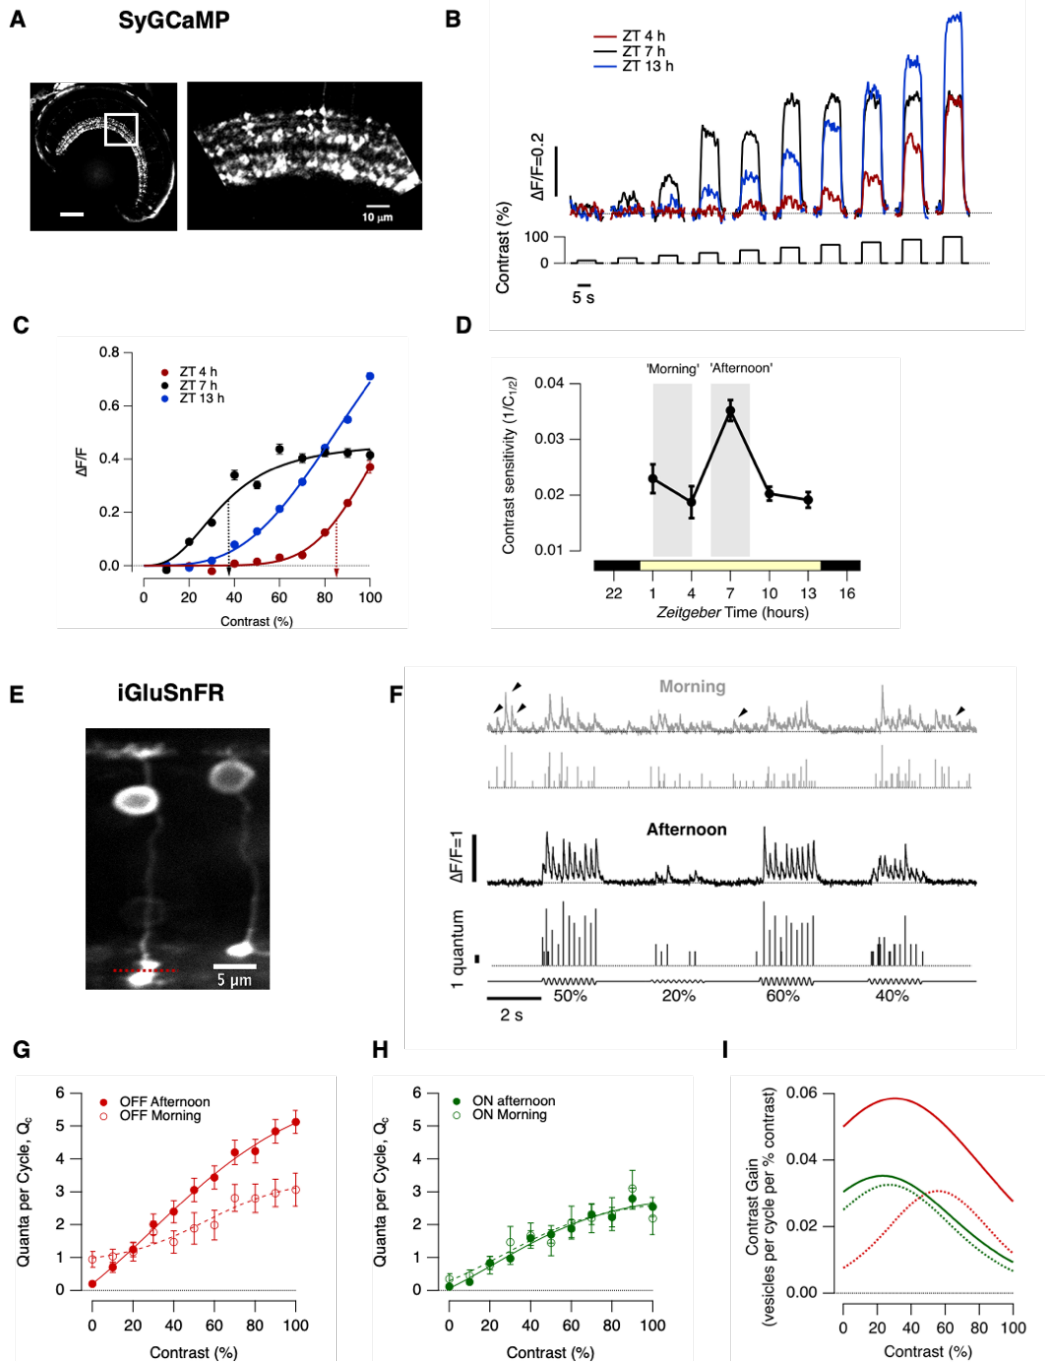

86

87

**Figure 1: Diurnal modulation of contrast-sensitivity and synaptic gain**

88

**A.** Left: Retina of a Ribeye::SyGCaMP2 fish with box over the IPL. Right: expansion of the boxed

89

region of showing terminals of bipolar cells. **B.** Averaged responses to stimuli of different contrasts

90

measured at *Zeitgeber* time 4, 7 and 13 hrs. **C.** Peak response amplitude as a function of contrast for

91

terminals shown in B. The smooth lines are Hill functions used to interpolate values of  $C_{1/2}$ , the contrast

92

generating the half-maximal response. Note the diurnal variations. At ZT = 4 hrs:  $C_{1/2} = 86 \pm 2\%$

93

(dashed red arrow);  $h = 7.0 \pm 1.2$ . At ZT = 7 hrs:  $C_{1/2} = 35 \pm 2\%$  (dashed black arrow);  $h = 2.7 \pm 0.2$ .

94

At ZT = 13 hrs:  $C_{1/2} = 72 \pm 2\%$ ;  $h = 3.3 \pm 0.2$ . **D.** Variations in contrast-sensitivity as a function of

95

*Zeitgeber* time averaged across ON and OFF terminals. Note the peak around ZT = 7 hours which is

96

not mirrored in the diurnal variation in luminance sensitivity (Extended Data Figure 1). The grey bars

97 show the periods described as “morning” and “afternoon”. All error bars show  $\pm 1$  SD. **E.** Multiphoton  
98 section through the eye of a zebrafish larva (7 dpf) expressing iGluSnFR in a subset of bipolar cells.  
99 The red dashed line shows the typical position of a line-scan through a synaptic terminal. **F.** Examples  
100 of iGluSnFR signals from an individual OFF synapse elicited using a stimulus of variable contrast  
101 modulated at 5 Hz (0-100%, full field, sine wave) in the morning (ZT 1-3 hours, grey) and afternoon  
102 (ZT 6-9 hours, black). Note the high levels of spontaneous activity in the morning (black arrowheads).  
103 In each case the top trace shows the iGluSnFR signal and the lower trace the estimated number of  
104 quanta composing each event ( $Q_e$ ). **G.** Average contrast-response functions in OFF bipolar cell  
105 synapses in the morning (open circles;  $n = 20$  synapses) and afternoon (closed;  $n = 59$ ), where the  
106 response ( $R$ ) was quantified as the average of quanta per cycle ( $Q_c$ ). The smooth lines are fits of a  
107 sigmoid used for smoothing. Note the differences in the shape of the contrast-response functions and  
108 in the levels of spontaneous activity (zero contrast). **H.** Average contrast-response functions in ON  
109 bipolar cell synapses in the morning (open circles;  $n = 12$  synapses) and afternoon (closed;  $n = 31$ ).  
110 There was no significant difference in in the morning relative to afternoon (Chi-square test,  $p = 0.9999$ ).  
111 **I.** The contrast gain calculated as the derivative of the fits to the contrast-response functions in G and  
112 H. Note that the maximum contrast discrimination is increased by a factor of 2x in the OFF channel  
113 during the afternoon.

114

## 115 **Dopamine regulates contrast gain**

116 A key neuromodulator in the retina is dopamine released from amacrine cells under  
117 control of internal circadian clocks<sup>12,27</sup> as well as external signals, such as changes  
118 in luminance<sup>14</sup> or the appearance of food-related odours<sup>28</sup>. Dopamine levels are a  
119 minimum at night and increase throughout the day to modulate luminance-  
120 sensitivity<sup>14,29</sup> (Extended Data Figure 3). To test whether dopamine also regulates  
121 contrast sensitivity we injected agonists or antagonists of D1 receptors into the eye.  
122 Fig. 2A shows examples of the output from a synapse imaged in the afternoon,  
123 before and after injection of the D1 antagonist SCH 23390 ( $\sim 0.1 \mu\text{M}$ ). Counteracting  
124 the actions of endogenous dopamine reduced the average rate of vesicle release  
125 and shifted the CRF such that the maximum contrast gain was achieved at higher  
126 contrasts (Fig. 2B and C). Conversely, increasing activation of D1 receptors in the  
127 morning by injection of the agonist ADTN ( $\sim 0.2 \mu\text{M}$ ) increased response gain.

128 The dynamic range over which D1 receptors adjusted synaptic gain was  
129 calculated as the ratio of the CRFs in the presence of the agonist and antagonist:  
130 in both ON and OFF channels the maximum modulation was  $\sim 16$ -fold, occurring at

131 contrasts of 20-40% (Fig. 2D). Diurnal modulation of gain was narrower than this  
 132 potential range: 1.7-fold in OFF synapses and 1.1-fold in ON.

133

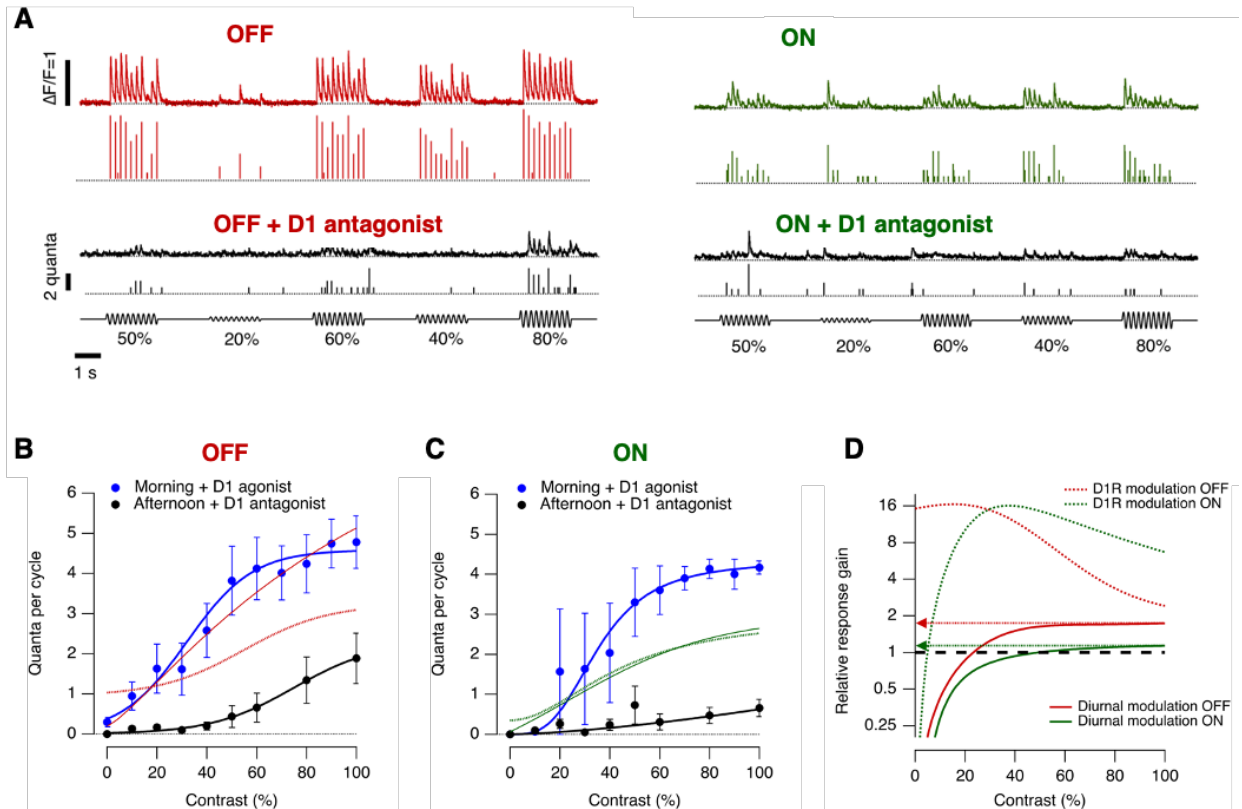

134

135

**Figure 2. Diurnal changes in dopamine levels modulate of contrast-sensitivity and synaptic gain**

136

**A.** Examples of iGluSnFR signals recorded in the afternoon from an individual OFF (red trace) and ON (green trace) synapses elicited using a stimulus of variable contrast before and after intravitreal injection of the D1 antagonist, SCH 23390 (black traces; 5 Hz modulation). Note that SCH 23390 abolished synaptic responses at lower contrasts in ON and OFF synapses. In each case the top trace shows the iGluSnFR signal and the lower trace the estimated  $Q_e$ .

137

138

139

140

141

142

143

144

145

146

147

148

149

150

151

152

153

**B.** Average contrast-response functions in OFF bipolar cell synapses after administration of D1 antagonist (black dots) in the afternoon and after administration of the D1 agonist ADTN in the morning (blue dots). Each point shows the mean  $\pm$  s.e.m. (SCH 23390,  $n=12$  synapses; ADTN,  $n=12$  synapses). Control responses observed in the morning and afternoon are superimposed in the graph (red lines, see Fig. 2C) **C.** Average contrast-response functions in ON bipolar cell synapses in three conditions: afternoon (green dots), after intravitreal injection of D1 antagonist in the afternoon (black dots) and ADTN in the morning (blue dots). Each point shows the mean  $\pm$  s.e.m. (SCH 23390,  $n=7$  synapses; ADTN,  $n=5$  synapses). Control responses observed in the morning and afternoon are superimposed to the graph (green lines, see Fig. 2D) **D.** Relative response gain by diurnal modulation and after manipulation of dopaminergic signalling (dashed lines). Note that diurnal modulation of synaptic gain is higher in OFF synapses, whereas dopamine modulates the dynamic range by  $\sim 16$  fold-change in ON and OFF synapses.

154 **Diurnal modulation of synaptic noise and variability**

155 In the framework of information theory<sup>30</sup>, an increase in synaptic gain will tend to  
156 reduce uncertainty (and therefore increase information) by causing a larger change  
157 in the number of vesicles released when contrast changes. But information is  
158 destroyed by “noise” and synapses are a major source of such variability within  
159 neural circuits<sup>5,31,32</sup>. We therefore investigated the diurnal modulation of four  
160 aspects of synaptic noise and variability.

161

162 **i) Spontaneous release.** Increases in synaptic gain were accompanied by a  
163 decrease in the spontaneous release of vesicles in the absence of a visual stimulus.  
164 In the morning, spontaneous events occurred at relatively high rates (Fig. 3A)  
165 composed of both single vesicles and MVR (Fig. 3B and C). Integrating across  
166 events of all amplitudes, the average rate of spontaneous release in OFF synapses  
167 was  $4.5 \pm 2.5$  vesicles  $s^{-1}$  in the morning falling to  $1 \pm 0.2$  vesicles  $s^{-1}$  in the afternoon  
168 (Fig 3B). In ON synapses these values were  $1.8 \pm 0.8$  vesicles  $s^{-1}$  and  $0.5 \pm 0.2$   
169 vesicles  $s^{-1}$  (Fig. 3C). In both channels, therefore, spontaneous noise was ~4 times  
170 lower in the afternoon compared to the morning. Increased activation of D1  
171 receptors suppressed noise in the morning to levels close to those measured in the  
172 afternoon, but only in OFF synapses (Fig. 3B and C).

173

174



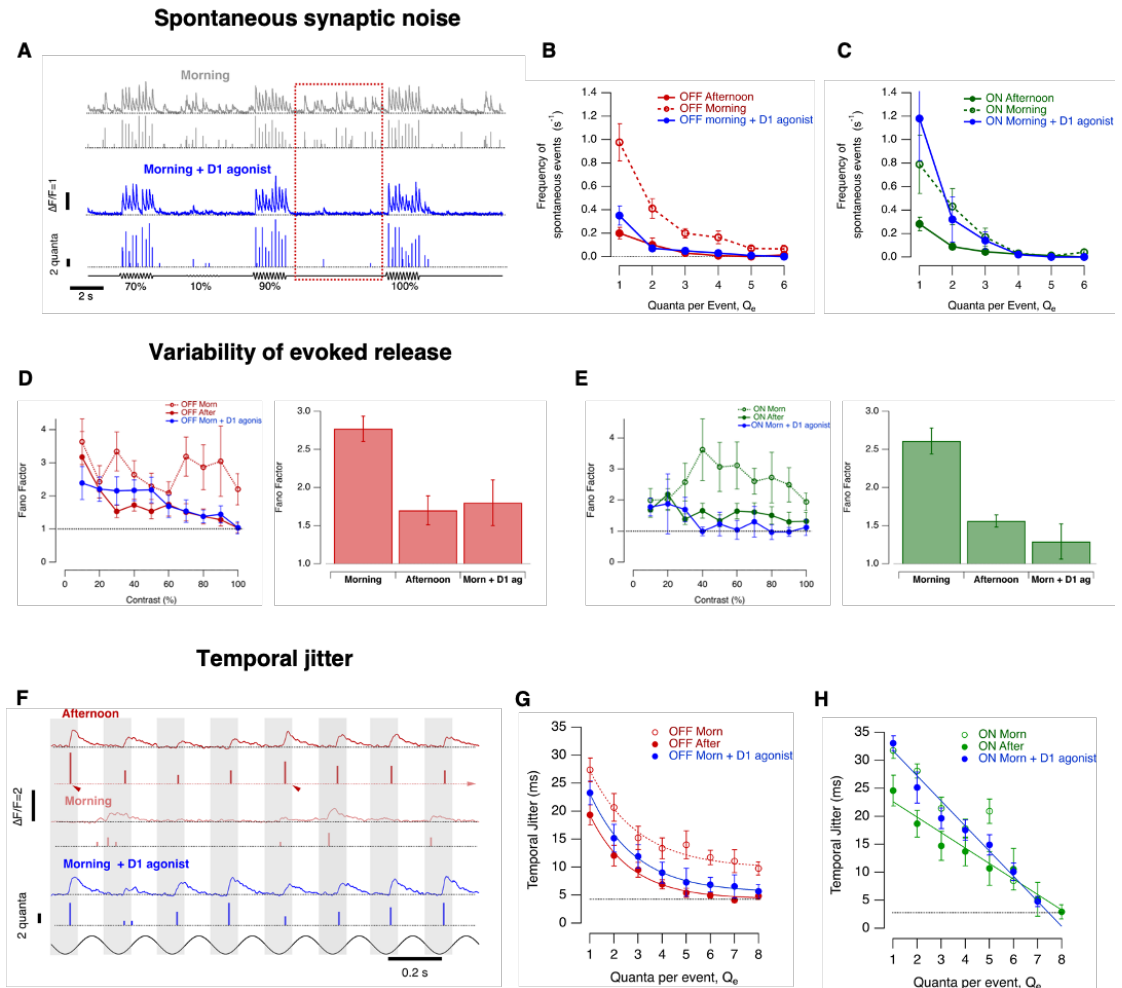

175

176

**Figure 3. Diurnal modulation of synaptic noise and variability**

177

**A. Top:** Example of iGluSnFR signals from an individual OFF synapse elicited using a stimulus of variable contrast in the morning (0-100%, 5 Hz modulation). In this example, note the high levels of spontaneous activity that were quantified as the responses elicited at zero contrast (red dashed box)

178

**. Bottom.** Examples of iGluSnFR signals from the same OFF synapse after intravitreal injection of ADTN. Note the increase in amplitude and frequency of events and the reduction of spontaneous activity. In each case the top trace shows the iGluSnFR signal and the lower trace the estimated  $Q_e$ .

179

**B.** Quantification of spontaneous events composed by different  $Q_e$  in OFF synapses in the morning ( $n = 20$  synapses), morning + ADTN ( $n = 12$ ) and afternoon ( $n = 24$  synapses). Note the suppression of spontaneous events in OFF synapses after intravitreal injection of ADTN in the morning. **C.** As B, but in ON synapses ( $n = 5-17$ ). Spontaneous activity was not significantly changed by ADTN. **D. Left:**

180

Variability in the evoked response of OFF synapses calculated as the Fano factor, where each response was quantified as the total number of vesicles released over one cycle at the contrasts shown. Comparison is made between the morning ( $n = 18$ ), afternoon ( $n = 27$ ) and the morning after injection of ADTN ( $n = 13$ ). **Right:** Average Fano factor for each condition was significantly higher in the morning compared to either the afternoon or in the morning after injection of ADTN (t-test;  $p < 0.0001$ ; bars  $\pm 1$  sd). **E.** As in D, but for ON synapses ( $n = 12, 15$  and  $6$  synapses for respective conditions). Again, the average Fano factor was significantly higher in the morning (t-test;  $p < 0.001$ ).

181

**F.** Example recordings from two OFF synapses stimulated at 60% contrast in three conditions:

182

183

184

185

186

187

188

189

190

191

192

193

194

195 afternoon (top, deep red trace), morning (middle, light red trace) and after injection of ADTN in the  
196 morning (bottom, blue trace). The comparison with and without ADTN is from the same synapse. In  
197 each case the top trace shows the iGluSnFR signal and the lower trace the estimated  $Q_e$ . The  
198 modulation in intensity is shown below. Note that events occur at different phases of the stimulus. **G.**  
199 Temporal jitter of events composed of different numbers of quanta in OFF synapses in the afternoon  
200 ( $n = 24$  synapses), morning ( $n = 19$ ) and morning + ADTN ( $n = 16$ ). Release events occurring in the  
201 morning were significantly less phase-locked than the afternoon ( $p < 0.001$ ; t-test). Activation of D1  
202 receptors reduced temporal jitter for events composed of 3 or more quanta ( $p < 0.004$ ). The solid lines  
203 describing these relations in the three conditions are described by a single exponential decay function  
204 of the form  $y_0 + A_{\text{exp}}(-((x-x_0)/\tau))$  with  $y_0 = 4.23 \pm 1.2$  and  $A = 27 \pm 7$  in the afternoon;  $y_0 = 9.77 \pm 1.4$   
205 and  $A = 28.64 \pm 5.6$  in the morning and  $y_0 = 5.45 \pm 1.3$ ,  $A = 30. \pm 6.1$  after activation of D1 receptor in  
206 the morning. **H.** As **G**, but for ON synapses ( $n = 6-14$ ). Activation of D1 receptors had no significant  
207 effect on temporal jitter. The relationship observed in the morning is described by a straight line with a  
208  $y = 34.7 \pm 1.5$  and a slope =  $-3.6 \pm 0.5$ .

209

210 **ii) Variability in stimulus-evoked responses.** This was assessed by the Fano  
211 factor ( $F$ ), the ratio of the variance-to-mean of the response measured over multiple  
212 trials<sup>33,34</sup>. In the morning,  $F$  was  $\sim 2.6$  in both ON and OFF synapses when averaged  
213 over a range of contrasts, falling to  $\sim 1.6$  in the afternoon ( $p < 0.001$ , t-test; Fig.3D-  
214 E). Notably, the variability of synaptic output was higher than expected for a  
215 Poisson process, for which  $F = 1$ . Activation of D1 receptors in the morning  
216 improved the reliability of synaptic responses to levels similar to those measured in  
217 the afternoon (Fig.3 D-E).

218

219 **iii) Temporal jitter.** Retinal ganglion cells (RGCs) encode information not just in  
220 their spike count but also in the timing of spikes<sup>35,36</sup>. Spike times can vary by just a  
221 few milliseconds and this accuracy depends on the precision of excitatory inputs  
222 received from bipolar cells<sup>37</sup>. The standard deviation in timing of release events  
223 ("temporal jitter") was measured relative to the phase of a 5 Hz stimulus and the  
224 larger the release event the more precise it was on average (Fig. 3F-H). In OFF  
225 synapses the temporal jitter was 5-8 ms lower in the afternoon compared to the  
226 morning for events composed of up to 8 vesicles (Fig. 3G). Diurnal modulation of  
227 temporal precision was weaker in ON synapses and only significant for events

228 composed of 1-3 vesicles (Fig. 3H). Increasing activation of D1 receptors in the  
229 morning reduced temporal jitter in OFF synapses ( $p < 0.004$ , t-test) but not ON.

230

231 ***iv) Changes in the distribution of multivesicular events.*** Previous studies  
232 quantifying the synaptic transfer of visual information have been limited by the  
233 inability to monitor individual active zones and used the assumption that vesicles are  
234 released according to Poisson statistics<sup>38-40</sup>. We know now that bipolar cells do not  
235 employ a simple rate-code and that visual information is also contained in the  
236 *amplitude* of multivesicular events<sup>23</sup>. To test whether modulation of contrast gain  
237 was accompanied by changes in the number of quanta in an event ( $Q_e$ ) we  
238 compared the amplitude distribution in the morning and afternoon. Fig. 4A makes  
239 this comparison for a stimulus of 60% contrast. In ON synapses, 68% of release  
240 events in the morning were univesicular, falling to 40% in the afternoon ( $p < 10^{-4}$ ,  
241 chi-squared test) and this shift was fully reversed by antagonizing D1 receptors (Fig.  
242 4B). MVR was more prevalent in OFF synapses with only 38% of release events in  
243 the morning being univesicular but again there was a significant shift towards MVR  
244 in the afternoon (Fig. 4C;  $p < 0.02$ ). Qualitatively similar diurnal modulation of MVR  
245 was observed over a range of contrasts from 20% to 80%.

246

247

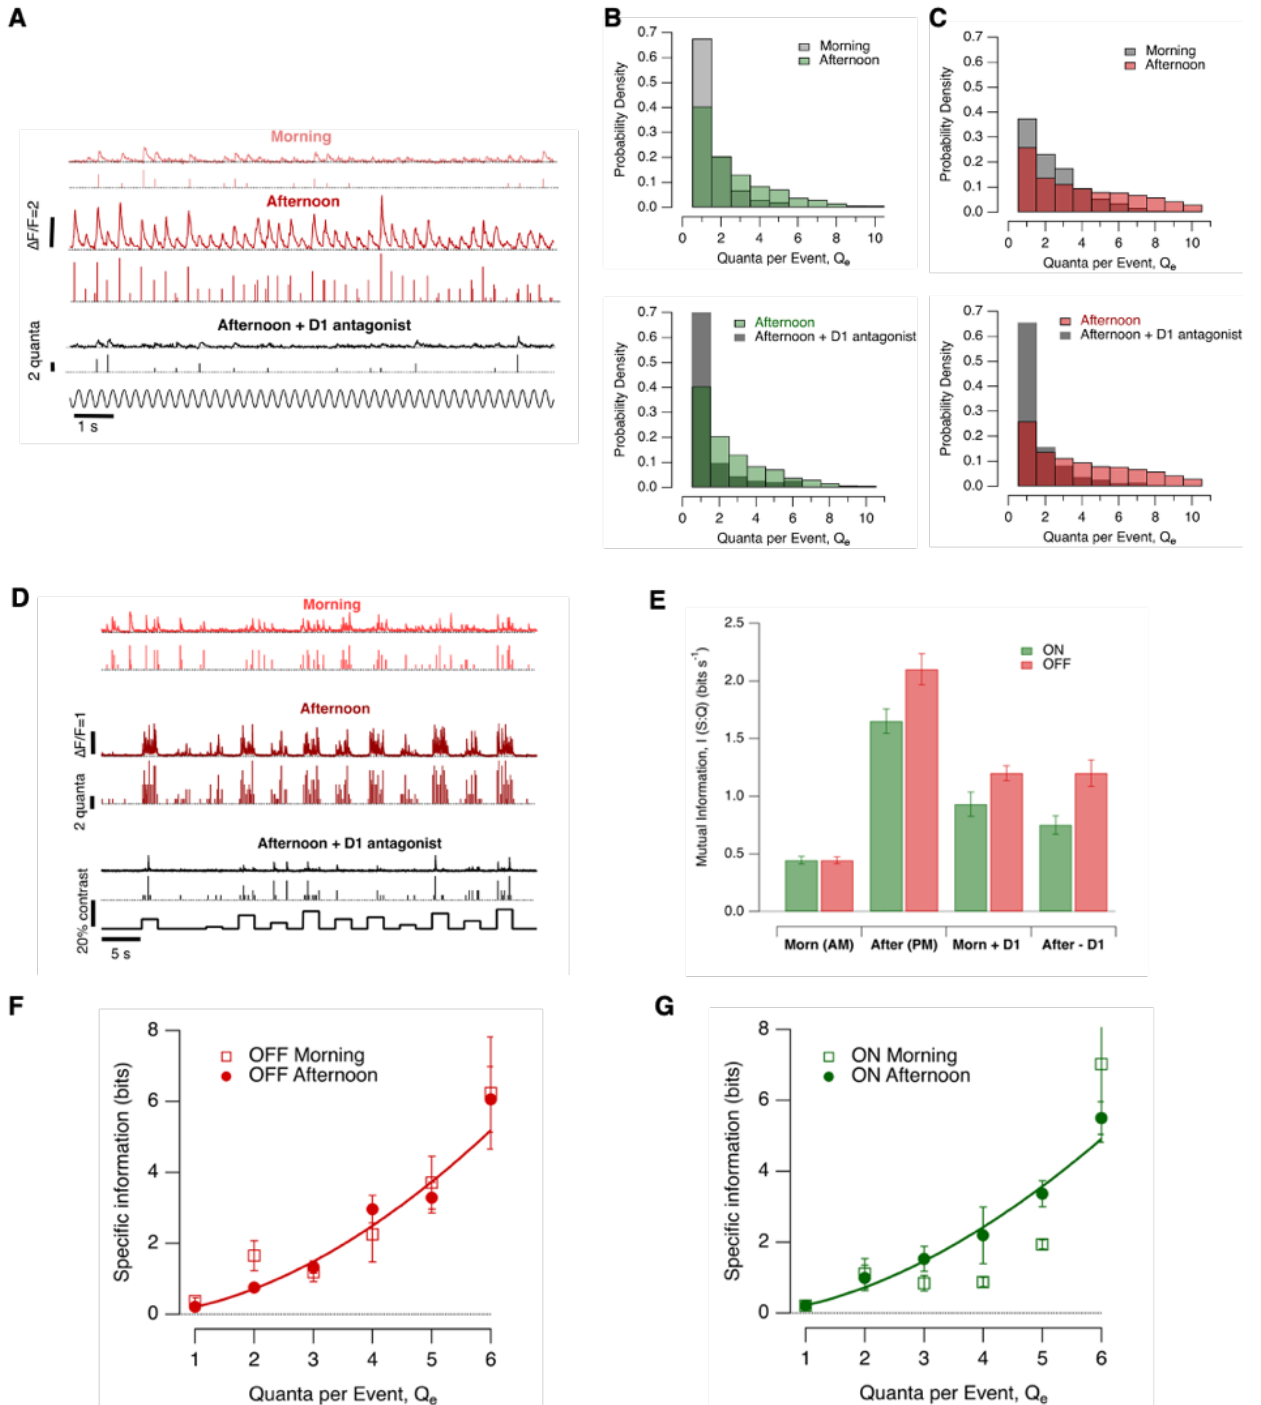

248

**Figure 4. Diurnal changes in the efficiency of information transmission**

249

**A.** Examples of iGluSnFR signals from an individual synapse elicited (60% contrast, 5 Hz) in the morning, afternoon and afternoon after injecting SCH 23390. In each case the top trace shows the iGluSnFR signal and the lower trace the estimated  $Q_e$ . **B.** Top: Changes in  $Q_e$  in ON synapses in the morning and afternoon. In the afternoon the distribution was shifted toward multiquantal events ( $p < 0.059$ , Chi-squared test). Bottom: Changes in the distribution of  $Q_e$  in ON synapses before and after intravitreal injection of the D1 antagonist SCH23390. The distribution was shifted toward lower  $Q_e$  ( $p < 0.001$ ) but was not significantly different to that measured in the morning. **C.** As B, but for OFF

255

256 synapses. In the afternoon the distribution was shifted toward multiquantal events ( $p < 0.007$ ). In the  
257 afternoon, injection of SCH 23390 shifted the distribution toward uniquantal events ( $p < 0.001$ ). **D.**  
258 Examples of synaptic responses over 12 different contrasts spanning  $\pm 10\%$  around the contrast  
259 eliciting the half-maximal response ( $C_{1/2}$ ) in the morning (top, light red), afternoon (middle, dark red)  
260 and after injection of D1 antagonist SCH 23390 in the afternoon (bottom, black; note the lower  
261 frequency and amplitude of release events). In each case the top trace shows the iGluSnFR signal  
262 and the lower trace the estimated  $Q_e$ . Each contrast step lasted 2 s (5 Hz) and each trace is from a  
263 different OFF synapse. **E.** Mutual information  $I(S;Q)$  in four conditions: (i) morning, (ii) afternoon, (iii)  
264 morning after injection of ADTN, (iv) afternoon after injection of SCH 23390. **F.** Specific information  
265 ( $I_2$ ) for events of different quantal content in OFF synapses (33 synapses). The curve describing the  
266 relation is a least-squares fit of a power function of the form  $i = A Q_e^x$ , with  $A = 0.20$ , and  $x = 1.81$ . **G.**  
267 As F, but for ON synapses ( $n = 13$ ). The curve describing the relation is almost identical  
268 ( $A = 0.21$ , and  $x = 1.75$ ).  
269

## 270 **Diurnal modulation of information transmission**

271 How do changes in synaptic gain (Figs.1-2), noise and variability (Fig. 3) and MVR  
272 (Fig. 4-C) combine to alter the amount of visual information transmitted? A larger  
273 synaptic signal relative to noise (SNR) will increase the mutual information ( $I$ )  
274 between the response ( $q$ ) and the stimulus generating it ( $S$ ), although the size of  
275 the increase will depend on the statistical properties of both signal and noise<sup>41</sup>. In  
276 the simple situation where both have a Gaussian distribution  $I = 0.5 \log_2(1 + \text{SNR})$ <sup>42</sup>.  
277 But how should we quantify the synaptic signal? When analyzing the spike code,  
278 all events comprise the same symbol and the response can be described as the  
279 number of spikes in each of a series of time bins<sup>41,43</sup>. The output from bipolar cells  
280 is qualitatively different with a visual stimulus being encoded both by the timing of  
281 release events and their amplitudes<sup>23</sup>. We therefore took an approach in which  
282 MVR composed of different numbers of vesicles were considered different symbols.  
283 The mutual information between the response and stimulus was then computed as  
284 the average amount of information about the stimulus gained from observing any  
285 symbol<sup>30,44</sup>.

286 In the morning, the average mutual information between stimulus and response  
287 was almost the same for ON and OFF synapses ( $0.445 \pm 0.035$  bits  $s^{-1}$  and  $0.455 \pm$

288 0.03 bits s<sup>-1</sup>, respectively; Fig. 4E). In the afternoon mutual information increased  
289 through both channels but the increase in OFF synapses (370%) was significantly  
290 larger than in ON (270%;  $p < 0.001$  by t-test; Fig. 4E). Mutual information in the  
291 morning was increased by activation of D1 receptors and in the afternoon it was  
292 decreased by antagonizing the effects of endogenous dopamine, although not to  
293 levels measured in the morning (Fig. 4E).

294 Together, the results in Figs. 1-4 demonstrate that dopamine is a key  
295 neuromodulator controlling diurnal changes in information transmission in the retina,  
296 but also leave open the possibility that other pathways contribute.

297

### 298 **Diurnal changes in the efficiency of the vesicle code**

299 The transmission of information using spikes and vesicles requires energy so an  
300 important question becomes the efficiency with which these symbols are used<sup>45</sup>.  
301 RGCs firing at low rates cells transmit ~3.5 bits/spike while those that fire most  
302 briskly encode ~2 bits/spike<sup>46</sup>. In comparison, the 2.7-fold increase in information  
303 transmitted through ON synapses in the afternoon (Fig. 4E) occurred *without* a  
304 change in the average rate of vesicle release (Fig. 2D and E). In OFF synapses,  
305 mutual information increased 3.7-fold while release rates around C<sub>1/2</sub> increased just  
306 2-fold (Fig. 2C and E). The diurnal increase in the average rate of vesicle release  
307 was therefore associated with a 1.4- to 2.7-fold *increase* in the average efficiency  
308 with which vesicles were used to encode changes in contrast. This situation is  
309 distinct to that observed in the binary spike code of post-synaptic RGCs, where an  
310 increase in spike rate is associated with a *decrease* in the efficiency of information  
311 transmission<sup>46</sup>.

312 How does the vesicle code become more efficient at higher average release  
313 rates? To understand this we need to consider changes in the distribution of  
314 vesicles: MVR events become more prevalent in the afternoon (Fig. 4A-C) and

315 larger MVR events carry more information per vesicle<sup>23</sup>, as shown by the supralinear  
316 relation between the specific information carried by each synaptic symbol and the  
317 number of vesicles it contains (Fig. 4F-G). This relation did not, however, change  
318 in the afternoon compared to the morning, at least for events composed of 1-6  
319 vesicles (Fig. 4F and G; chi-squared test). The amount of information carried by  
320 each synaptic symbol was therefore independent of diurnal changes in visual  
321 processing.

322

### 323 **Discussion**

324 Synapses allow the flow of information through circuits to be adjusted<sup>1,5</sup> and this  
325 study provides a quantitative understanding of this idea in the context of the diurnal  
326 control of sensory processing. We find a dopamine-dependent increase in  
327 transmission of visual information that can be ascribed to four major effects: an  
328 increase in the number of vesicles released by a stimulus (Figs. 1 and 2), a  
329 decrease in spontaneous noise (Fig. 3A-C), reduced variability of evoked responses  
330 (Fig. 3D-H) and a shift from univesicular to multivesicular release (Fig. 4). The  
331 relative contributions of these various mechanisms differed between ON and OFF  
332 pathways but MVR was fundamental to both.

333 A recent combination of electrophysiology with correlative light-and electron-  
334 microscopy has led to the suggestion that it may be a fundamental mode of synaptic  
335 transmission throughout the nervous system<sup>11</sup> and it is established that MVR can  
336 be modulated by activity<sup>7,47</sup> and by presynaptic modulation, for instance through  
337 muscarinic acetylcholine receptors in the striatum<sup>10</sup> or GABA<sub>B</sub> receptors in the  
338 cortex<sup>48</sup>. This study has demonstrated that potentiation of MVR can not only  
339 increase the amount of information that a sensory synapse transmits but also  
340 increases the efficiency with which it is transmitted. Ever-improving techniques for  
341 monitoring synaptic output *in vivo* will help us understand how far neuromodulators

342 acting in other parts of the brain modulate MVR and the vesicle code that transmits  
343 information between neurons.

344

345

## 346 **Methods**

347

### 348 **Zebrafish husbandry**

349 Fish were raised and maintained under standard conditions on a 14 h light/10 h dark  
350 cycle<sup>40</sup>. To aid imaging, fish were heterozygous or homozygous for the casper mutation  
351 which results in hypopigmentation and they were additionally treated with 1-phenyl-2-  
352 thiourea (200  $\mu$ M final concentration; Sigma) from 10 hours post fertilization (hpf) to  
353 reduce pigmentation. All animal procedures were performed in accordance with the  
354 Animal Act 1986 and the UK Home Office guidelines and with the approval of the  
355 University of Sussex Animal Welfare and Ethical Review Board. More information  
356 about experimental design and reagents is available in the Life Sciences reporting  
357 Summary.

358

### 359 **Transgenic fish**

360 Experiments were carried out using the following transgenic lines of zebrafish:

361 i) *Tg(ribeye;;Zf-SyGCaMP2)* expressing the synaptically-localized fluorescent  
362 calcium reporter SyGCaMP 2.0 in retinal bipolar cells under the ribeye-A promoter<sup>25</sup>.

363 ii) *Tg(-1.8ctbp2:Gal4VP16\_BH)* fish that drive the expression of the transcriptional  
364 activator protein Gal4VP16 were generated by co-injection of I-SceI meganuclease  
365 and endofree purified plasmid into wild-type zebrafish with a mixed genetic background.  
366 A myocardium-specific promoter that drives the expression of mCherry protein was  
367 additionally cloned into the plasmid to allow for phenotypical screening of founder fish.



368 *iii) Tg(10xUAS:iGluSnFR\_MH)* fish driving the expression of the glutamate sensor  
369 iGluSnFR under the regulatory control of the 10 x UAS enhancer elements were  
370 generated by co-injection of purified plasmid and tol2 transposase RNA into offspring  
371 of AB wildtype fish outcrossed to casper wildtype fish. The sequences for the  
372 myocardium-specific promoter driving the expression of enhanced green fluorescent  
373 protein (mossy heart) were added to the plasmid to facilitate the screening process.  
374 *iv) Tg(-1.8ctbp2:SyGCaMP6)* fish were generated by co-injection of I-SceI  
375 meganuclease and endofree purified plasmid into wild-type zebrafish with a mixed  
376 genetic background. The GCaMP6f variant was kindly provided by L. Looger (Janelia  
377 Farm). This variant holds a T383S mutation in comparison to the commercially  
378 available GCaMP6-fast version (Addgene plasmid 40755).  
379 *v) Tg(isl2b:nlsTrpR, tUAS:memGCaMP6f)* which drives the expression of  
380 memGCaMP6f in the optic tectum was generated by co-injecting pTol2-isl2b-hlsTrpR-  
381 pA and pBH-tUAS-memGCaMP6f-pA plasmids into single-cell stage eggs. Injected fish  
382 were out-crossed with wild-type fish to screen for founders.

383

#### 384 **Multiphoton Imaging *In Vivo***

385 Experiments were carried out in a total of 117 zebrafish larvae (7–9 days post-  
386 fertilization). Fish were immobilized in 3% low melting point agarose (Biogene) in E2  
387 medium on a glass coverslip (0 thickness) and mounted in a chamber where they were  
388 superfused with E2. Imaging was carried out using a two-photon microscope  
389 (Scientifica) equipped with a mode-locked titanium-sapphire laser (Chameleon,  
390 Coherent) tuned to 915 nm and an Olympus XLUMPlanFI 20x water immersion  
391 objective (NA 0.95). To prevent eye movements, the ocular muscles were paralyzed  
392 by injection of 1 nL of  $\alpha$ -bungarotoxin (2 mg/mL) behind the eye. Most imaging was  
393 carried out in the dorsal the retina.

394 The signal-to-noise ratio of the microscope was optimized by collecting photons  
395 through both the objective and a sub-stage oil condenser (Olympus, NA 1.4). Emission  
396 was filtered through GFP filters (HQ 535/50, Chroma Technology) before detection  
397 with GaAsP photomultipliers (H7422P-40, Hamamatsu). The signal from each detector  
398 passed through a current-to-voltage converter and then the two signals were added by  
399 a summing amplifier before digitization. Scanning and image acquisition were  
400 controlled under ScanImage v.3.6 software<sup>49</sup>. In iGluSnFR recordings images were  
401 acquired at 10 Hz (128 × 100 pixels per frame, 1 ms per line) while linescans were  
402 acquired at 1 kHz. In GCaMP recordings images were acquired at 20 Hz (128 × 50  
403 pixels per frame, 1 ms per line). Full-field light stimuli were generated by an amber  
404 LED ( $I_{\max} = 590$  nm, Thorlabs), filtered through a 590/10 nm BP filter (Thorlabs), and  
405 delivered through a light guide placed close to the eye of the fish. These wavelengths  
406 will most effectively stimulate red and green cones. The microscope was synchronized  
407 to visual stimulation.

408

#### 409 **Stimulation protocols**

410 Measurements of contrast sensitivity with SyGCaMP2 were made by stimulating the  
411 fish with a series of 10 s stimuli (full-field sinusoidal modulation at 5 Hz) around a mean  
412 intensity of 55 nW mm<sup>-2</sup>. Measurements of contrast sensitivity with iGluSnFR used 2 s  
413 stimuli. To measure the distribution of events amplitudes and the temporal precision  
414 fish were continuously stimulated for 30 s at a given contrast.

415 Luminance sensitivity was assessed by stimulating the fish with a series of light  
416 steps (4 × 3 s) at 9 different light intensities increasing in steps of 0.5 log unit steps  
417 ranging from 11 pW mm<sup>-2</sup> to 110 nW mm<sup>-2</sup> (equivalent to  $3.3 \times 10^{11}$  photons mm<sup>-2</sup>).

418

419

420 **Drug injections**

421 Dopamine signalling was manipulated by injecting the antagonist of D1 receptors SCH  
422 23390 at a final estimated concentration of 200 nM (Sigma). Finally, the long-lasting  
423 dopamine receptor ligand [3H] 2-amino-6,7-dihydroxy 1,2,3,4-tetrahydronaphthalene  
424 (ADTN) (Sigma) was injected to a final estimated concentration of 200 nM. We  
425 confirmed that these drugs gained access by including 1 mM Alexa 594 in the injection  
426 needle; within 5 mins of injection the dye could be detected within the inner plexiform  
427 layer of the retina. Vehicle injection did not affect synaptic responses to varying  
428 contrast.

429

430 **Quantal decomposition of iGluSnFR signals.**

431 To detect and quantize glutamatergic events from line-scans, there were six major  
432 steps, described in detail previously<sup>23</sup>. Steps 4-6 are summarized in Extended Data  
433 Figure 4.

434 1. Separation of regions of interest (ROIs) by spatial decomposition using Gaussian  
435 fits to the average intensity profile across the line-scan. Typically 1-3 hot-spots of  
436 iGluSnFR fluorescence were detected in a single terminal, representing active zones  
437 within the line-scan. Active zones more than 1-1.5  $\mu\text{m}$  apart could be distinguished  
438 from each other.

439

440 2. Time series extraction by weighted averaging. Once each spatial component had  
441 been defined, a time series for that component,  $F(t)$ , was computed as the integral of  
442 the Gaussian fit to the linear intensity profile estimated in 1.

443

444 3. Baseline correction and calculation of  $\Delta F/F$ . Bleaching sometimes occurred during  
445 an observation episode and was corrected using a linear function of time. The  
446 iGluSnFR signal used for all analyses was the relative change in fluorescence,  $\Delta F/F_0$ ,

447 calculated from the bleach-corrected signals. The most frequent value (that is, the  
448 baseline) of the trace was used as F0.

449

450 4. Identification of events by Wiener deconvolution. Release events within an active  
451 zone were identified by their characteristic kinetics using a Wiener filter. The time-  
452 course of iGluSnFR transients could be described by a function of the form:

$$453 \quad h(t) = A * \exp\left[-\frac{t}{\tau_f}\right] * \left(1 - \exp\left[-\frac{t}{\tau_r}\right]\right), \quad (1)$$

454 where  $A$  describes the amplitude of the event and  $\tau_r$  and  $\tau_f$  are the time constants  
455 for rise and fall in the signal, respectively. Transients at most synapses could be  
456 described using a kernel with parameters of  $\tau_f = 0.06$  s and  $\tau_r = 0.001$  s. These  
457 parameters were relatively invariant for transients of different amplitudes so that  
458 iGluSnFR transients could be described as a linear time-invariant system (LTI). The  
459 filter described by equation 1 therefore allowed us to both “denoise” signals and  
460 estimate the underlying input. The result of the Wiener deconvolution was a time series  
461 in which glutamate release events were described approximately as Dirac- $\delta$  impulse.

462

463 5. Extraction of events. Although the use of Wiener deconvolution significantly  
464 improved the signal-to-noise ratio, the baseline in the deconvolved traces was not  
465 noiseless, making it necessary to set a threshold for counting a deviation in this signal  
466 as an event. The distribution of values in the deconvolved trace was measured and  
467 the threshold set at 3-4 standard deviations above the baseline. Events were then  
468 timed at the local maximum in the deconvolved trace above this threshold.

469

470 6. Amplitude clustering to create a time series of quantized events. A histogram of  
471 event amplitudes at an individual active zone could be described as the sum of  
472 Gaussians. The quantal amplitude, was then calculated as the average inter-peak  
473 distance, which was always similar to the amplitude of the first peak, indicating that the

474 first peak in the distribution represents vesicles released individually. Based on the  
475 evidence that glutamate transients of varying amplitude were integer multiples of a  
476 unitary event or quantum, we partitioned events into numbers of quanta using a  
477 Gaussian Mixture Model (GMM). Under this framework, the probability  $\mathbf{p}$  of a value  $\mathbf{x}$   
478 is given by:

479

$$480 \quad p(x) = \sum_{i=1}^K \phi_i \mathcal{N}(x|\mu_i, \sigma_i^2) \quad (2)$$

481 where  $\mathbf{N}$  is the normal probability density function and  $\Phi$  represents the mixing  
482 probability and sums to one. We used the Expectation-Maximization (EM) algorithm  
483 for clustering and this was run up to 15 times on the synapse, each with a different  
484 number of components and with the mean and variance parameters initialized  
485 randomly, until acceptable convergence had been reached. Defining a time series as  
486 the number of quanta within each event allowed for computation of vesicle release  
487 rates and information theoretic measures.

488

### 489 **Calculation of temporal jitter**

490 In order to quantify variability in the timing of glutamatergic events, we first calculated  
491 the vector strength,  $r_q$ , for events composed of  $q$  quanta:

$$492 \quad r_q = \frac{1}{N_q} \sqrt{\left( \sum_{i=1}^{N_q} \cos\left(\frac{2\pi t_{q_i}}{T}\right) \right)^2 + \left( \sum_{i=1}^{N_q} \sin\left(\frac{2\pi t_{q_i}}{T}\right) \right)^2} \quad (3)$$

493 where  $t_{q_i}$  is the time of the  $i^{\text{th}}$   $q$ -quantal event,  $T$  is the stimulus period, and  $N_q$  is the  
494 total number of events of composed of  $q$ -quanta. The temporal jitter,  $J_q$ , can then be  
495 calculated as:

$$496 \quad J_q = \frac{\sqrt{2(1 - r_q)}}{2\pi f} \quad (4)$$

497 where  $f$  is the stimulus frequency.

## 498 **Calculations based on Information Theory**

499 To quantify the amount of information about a visual stimulus that is contained within  
500 the sequence of release events from an active zone we first needed to convert  
501 bipolar cell outputs into a probabilistic framework from which we could evaluate the  
502 specific information ( $I_2$ ), a metric that quantifies how much information about one  
503 random variable is conveyed by the observation a specific symbol of another  
504 random variable<sup>41</sup>. The time series of quantal events was converted into a  
505 probability distribution by dividing into time bins of 20 ms, such that each bin  
506 contained either zero events or one event of an integer amplitude. We then counted  
507 the number of bins containing events of amplitude 1, or 2, or 3 etc. By dividing the  
508 number of bins of each type by the total number of bins for each different stimulus,  
509 we obtained the conditional distribution of  $\mathbf{Q}$  given  $\mathbf{S}$ ,  $p(\mathbf{Q}|\mathbf{S})$ , where  $\mathbf{Q}$  is the random  
510 variable representing the *quanta/bin* and  $\mathbf{S}$  is the random variable representing the  
511 *stimulus contrasts* presented throughout the course of the experiment. In the  
512 absence of information about the distribution of contrasts normally experienced by  
513 a larval zebrafish, a uniform distribution of contrasts was used for  $\mathbf{S}$ . Each contrast  
514 step lasted 2 s (5 Hz) and they were presented in two different pseudo-random  
515 orders, of which one is shown in Fig. 4D. The contrast sensitivity varied between  
516 synapses and between morning and afternoon (Fig. 1E-G) so to make allowance  
517 for this the stimulus set  $\mathbf{S}$  was adjusted for each synapse to span contrasts  $\pm 10\%$   
518 around  $C_{1/2}$  measured within that synapse.

519 We computed the joint probability distribution by the chain rule for probability  
520 (given the experimentally defined uniform distribution of stimuli  $\mathbf{S}$ ):

$$521 \quad p(\mathbf{S}, \mathbf{Q}) = p(\mathbf{Q}|\mathbf{S})p(\mathbf{S}) \quad (5)$$

522 In order to convert this distribution into the conditional distribution of  $\mathbf{S}$  given  $\mathbf{Q}$ , we  
523 used the definition of the conditional distribution:

$$524 \quad p(\mathbf{S}|\mathbf{Q}) = \frac{p(\mathbf{S}, \mathbf{Q})}{p(\mathbf{Q})} \quad (6)$$

525 From these distributions we computed two metrics: the mutual information  $I(\mathbf{S};\mathbf{Q})$ <sup>50</sup> and  
526 specific information  $I_2(\mathbf{S};\mathbf{q})$ <sup>44</sup>. Mutual information is defined traditionally as:

$$527 \quad I(\mathbf{S}; \mathbf{Q}) = H(\mathbf{S}) - H(\mathbf{S}|\mathbf{Q}) \quad (7)$$

$$528 \quad I(\mathbf{S}; \mathbf{Q}) = \sum_{s \in \mathbf{S}} \sum_{q \in \mathbf{Q}} p(s, q) \log_2 \frac{p(s)p(q)}{p(s, q)} = I(\mathbf{Q}; \mathbf{S}) \quad (8)$$

529 The specific information,  $I_2(\mathbf{S};\mathbf{q})$ , is defined as the difference between the entropy of  
530 the stimulus  $\mathbf{S}$  minus the conditional entropy of the stimulus given the observed symbol  
531 in the response  $q$ :

$$532 \quad I_2(\mathbf{S}, q) = H(\mathbf{S}) - H(\mathbf{S}|q) \quad (9)$$

$$533 \quad I_2(\mathbf{S}, q) = - \sum_{s \in \mathbf{S}} p(s) \log p(s) + \sum_{s \in \mathbf{S}} p(s|q) \log p(s|q) \quad (10)$$

534 representing the amount of information observing each quantal event type  $q \in \mathbf{Q}$  carries  
535 about the stimulus distribution  $\mathbf{S}$ . Note that mutual information can also be computed  
536 from the specific information as the dot product of the specific information vector  $I_2$   
537 and the vector describing the probability of an event of a given quantal size  $p(q)$ . This  
538 adds to the interpretability of both metrics – the specific information is the amount of  
539 information a single (specific) symbol gives about the stimulus, and the mutual  
540 information is the average amount of information about the stimulus gained from  
541 observing any symbol.

542

### 543 **Statistics**

544 All data are given as mean  $\pm$  s.e.m. unless otherwise stated in the figure legends.

545 All statistical tests met appropriate assumptions and were calculated using inbuilt

546 functions in IgorPro (Wavemetrics). When data were not normally distributed we

547 used non-parametric tests. All tests were two-sided and significance defined as

548  $P < 0.05$ . Data collection was not randomized because all experiments were carried

549 out within one set of animals. Delivery of different stimuli was randomized where

550 appropriate. Data were only excluded from the analysis if the signal-to-noise ratio

551 (SNR) of the iGluSnFR signals elicited at a given synapse was not sufficient to detect  
552 unitary responses to visual stimuli with a SNR of at least three.

553

#### 554 **Acknowledgements**

555 The authors express many thanks to all the members of Lagnado laboratory for  
556 discussions during the course of this project. We also thank Tom Baden for his many  
557 insightful criticisms and suggestions. This work was supported by a grant to L.L. from  
558 the Wellcome Trust (102905/Z/13/Z).

559

#### 560 **Author contributions**

561 J.M-D. conceived, designed and executed experiments, analyzed results and prepared  
562 the manuscript. B. J. carried out analysis and wrote code. F. E. conceived and  
563 executed experiments with SyGGCaM2 and carried out analysis. J. J. conceived and  
564 executed experiments and carried out analysis. L. L. conceived the project, designed  
565 experiments, analyzed data, repaired equipment, wrote code and prepared the  
566 manuscript.

567

568

569

570



571

## Extended Data

572

573

### Extended Data Figure 1

574

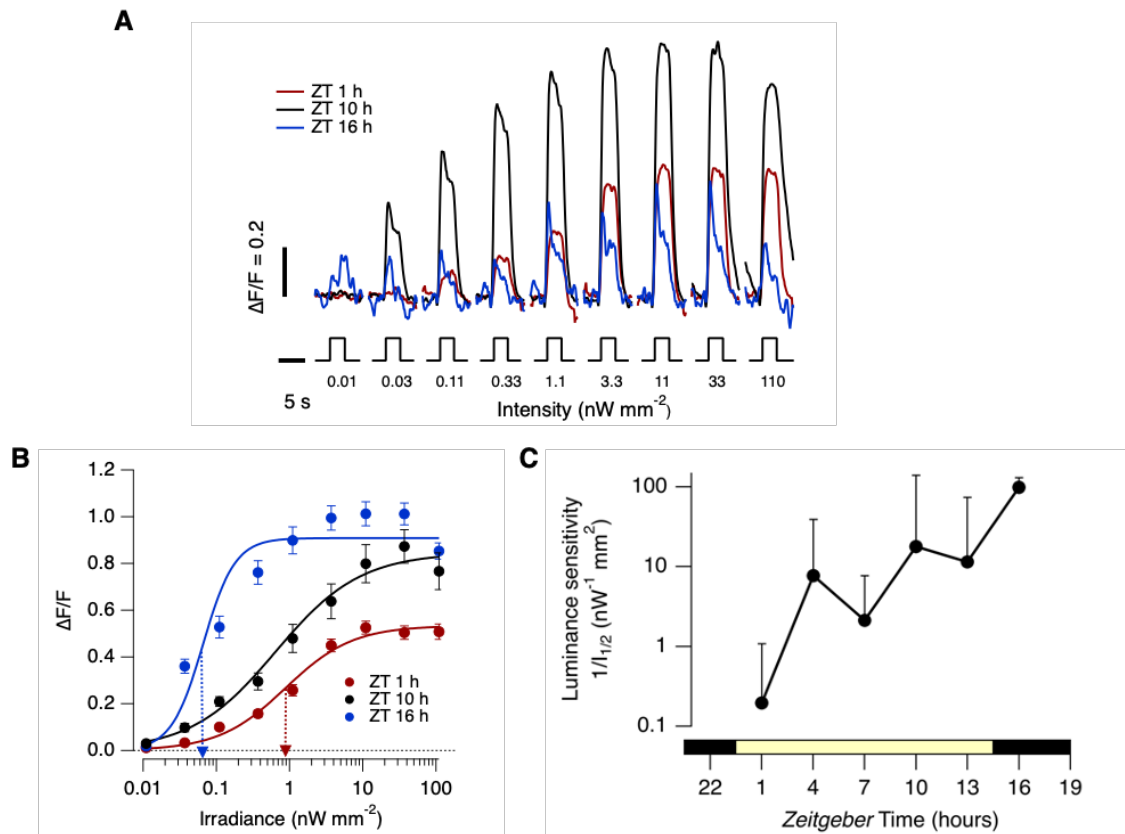

575

576

### Extended Data Figure 1. Diurnal changes in luminance-sensitivity of bipolar cell synapses

577

578

**A.** Averaged responses from ON terminals to light steps of different irradiance measured at *Zeitgeber* time 1, 10 and 16 hours. Note large variations in amplitude and kinetics. Each light step was of 3 s ( $n = 535$  terminals from 10 fish). **B.** Peak response as a function of irradiance for ON terminals in B. The smooth lines are Hill functions of the form  $R = R_{\max} \cdot (I^h / (I^h + I_{1/2}^h))$ , where  $R$  is the peak response,  $I$  is the irradiance,  $h$  is the Hill coefficient and  $I_{1/2}$  is the irradiance generating the half-maximal response. At ZT = 16 hrs:  $R_{\max} = 0.91 \pm 0.04$ ;  $h = 2.0 \pm 0.2$ ;  $I_{1/2} = 0.066 \pm 0.02$  nW/mm<sup>2</sup> (dashed blue arrow). At ZT = 10 hrs:  $R_{\max} = 0.85 \pm 0.06$ ;  $h = 0.8 \pm 0.1$ ;  $I_{1/2} = 0.65 \pm 0.18$  nW/mm<sup>2</sup>. At ZT = 1 hrs:  $R_{\max} = 0.853 \pm 0.02$ ;  $h = 0.9 \pm 0.2$ ;  $I_{1/2} = 0.88 \pm 0.18$  nW/mm<sup>2</sup> (red arrow). **C.** Variations in luminance sensitivity as a function of *Zeitgeber* time averaged across both ON and OFF terminals ( $n=535$  and 335, respectively). The lower bar shows the timing of the light-dark cycle.

589

590 **Extended Data Figure 2**  
591  
592

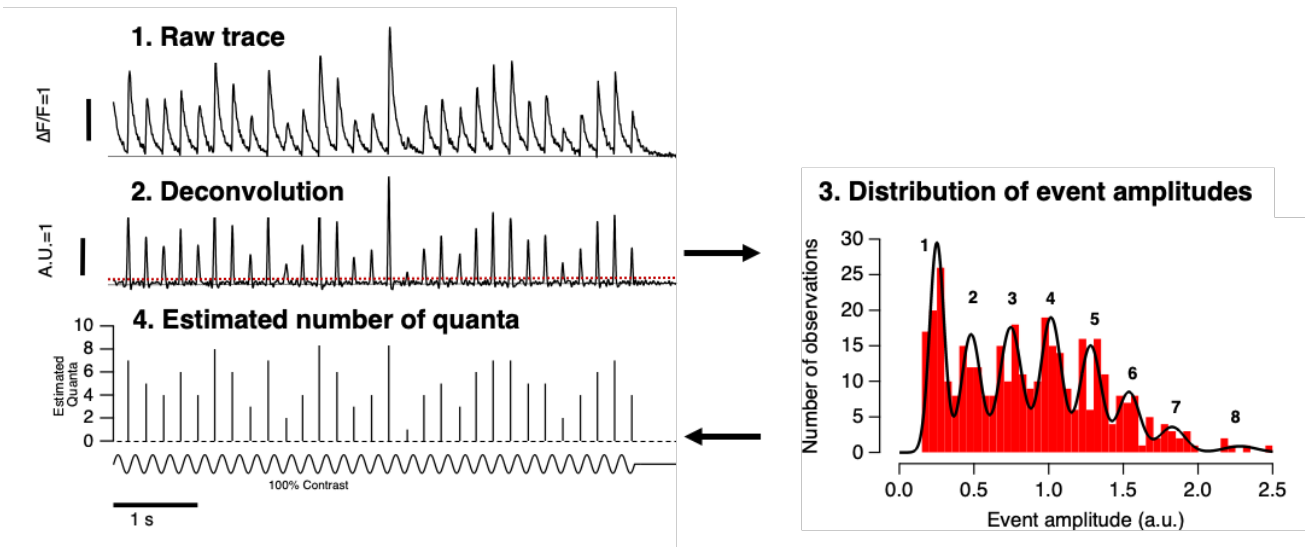

593

594 **Extended Data Figure 2. Decomposition of iGluSnFR signals into vesicle counts**

595 Summary of the basic steps for quantal decomposition of iGluSnFR signals. **1.** Raw trace  
596 extracted from individual active zones (linescan, 1 KHz). **2.** Deconvolved trace using the  
597 estimated Wiener filter. The dashed red line shows the threshold for counting events above  
598 the noise. **3.** Histogram of event amplitudes for a representative active zone (373 events  
599 accumulated using stimulus contrasts of 20%, 60% and 100% and a frequency of 5 Hz). The  
600 black line is a fit of eight Gaussians, identified using a Gaussian mixture model. Note that  
601 the variance of successive Gaussians did not increase in proportion to the peak number.  
602 The first peak had a value of 0.24, and the distance between peaks averaged 0.25, indicating  
603 the existence of a quantal event equivalent to ~0.25. **4.** Estimation of the number of quanta  
604 per event. For more details about analyses see James et al., 2019.

605

606

607 **Extended Data Figure 3**

608

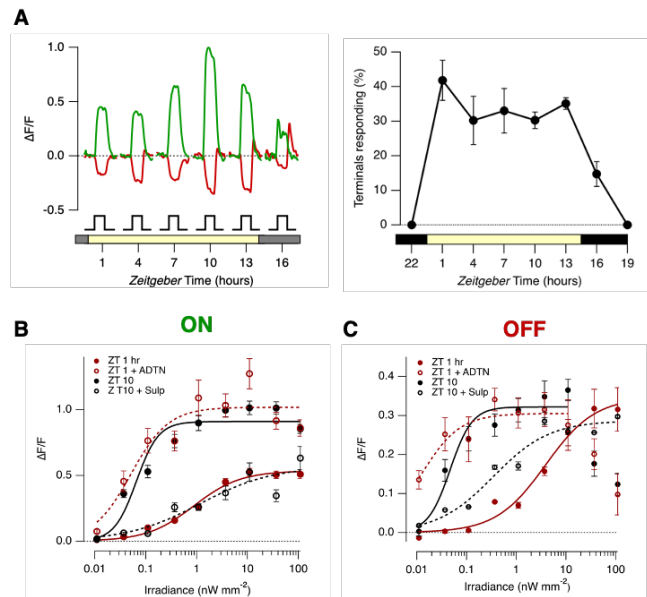

609

610 **Extended Data Figure 3. Diurnal changes in luminance sensitivity**

611 **A.** Left: Averaged SyGAMP2 signals at different *Zeitgeber* time. ON terminals green and

612 OFF terminas red. Each step of light ( $10 \text{ nW mm}^{-2}$ ) lasted 3 s. These averages are only

613 from responsive terminals. Right: the percentage of terminals generating a significant

614 response to the same light step (averaged across both ON and OFF). Bars show SD. **B.**

615 Effects of manipulating dopamine signalling on luminance sensitivity of the ON channel.

616 Luminance vs. response plots for ON terminals. Red circles compare this function at ZT 1

617 hr under control conditions (solid circle) and after injection of the non-selective dopamine

618 receptor agonist ADTN (~0.2  $\mu\text{M}$ ; open circles). ADTN caused a prompt change in the

619 luminance-response function to forms measured at ZT 10 hrs (solid black circles), increasing

620  $R_{\text{max}}$  from  $0.53 \pm 0.02$  to  $1.02 \pm 0.07$ , and reducing  $I_{1/2}$  from  $0.88 \pm 0.18 \text{ nW mm}^{-2}$  to  $0.05 \pm$

621  $0.02 \text{ nW mm}^{-2}$  ( $\pm$  sd, as estimated from the fitted Hill function shown). The higher gain and

622 luminance sensitivity at ZT 10 hrs could be explained as an effect of dopamine at D2

623 receptors, because it was completely reversed by injection of the selective D2 receptor

624 antagonist sulpiride (~2  $\mu\text{M}$ ; open black circles;  $R_{\text{max}} = 0.57 \pm 0.13$ ,  $I_{1/2} = 1.16 \pm 1.34 \text{ nW mm}^{-2}$ ).

625 Results collected from  $n = 535$  terminals from 38 fish. **C.** Effects of manipulating

626 dopamine signalling on luminance sensitivity of the OFF channel. Comparing control

627 responses at ZT 1 hr and 10 hrs showed a significant reduction in  $I_{1/2}$  from  $3.9 \pm 1.3$  to  $0.0128$

628  $\pm 0.005$ , but *without* a significant change in  $R_{\text{max}}$  ( $0.35 \pm 0.03$  vs  $0.30 \pm 0.02$ ). ADTN injected

629 at ZT 1 caused a prompt increase in luminance sensitivity, reducing  $I_{1/2}$  to  $0.013 \pm 0.005 \text{ nW}$

630  $\text{mm}^{-2}$ . The higher luminance sensitivity at ZT 10 hrs could be partly explained as an effect

631 of dopamine at D2 receptors, because injection of sulpiride (~2  $\mu\text{M}$ ; open black circles)

632 increased  $I_{1/2}$  from  $0.05 \pm 0.01 \text{ nW mm}^{-2}$  to  $0.35 \pm 0.14 \text{ nW mm}^{-2}$ . Results collected from  $n$

633  $= 355$  terminals from 38 fish.

634 **References**

635

636 1 Bargmann, C. I. & Marder, E. From the connectome to brain function. *Nat Methods*  
637 **10**, 483-490, doi:nmeth.2451 [pii] 10.1038/nmeth.2451 (2013).

638

639 2 McCormick, D. A., Nestvogel, D. B. & He, B. J. Neuromodulation of brain state and  
640 behavior. *Annual review of neuroscience* **43**, 391-415 (2020).

641

642 3 Nadim, F. & Bucher, D. Neuromodulation of neurons and synapses. *Current*  
*opinion in neurobiology* **29**, 48-56, doi:10.1016/j.conb.2014.05.003 (2014).

643

644 4 Patzke, C. *et al.* Neuromodulator signaling bidirectionally controls vesicle numbers  
in human synapses. *Cell* **179**, 498-513. e422 (2019).

645

646 5 Rusakov, D. A., Savtchenko, L. P. & Latham, P. E. Noisy Synaptic Conductance:  
Bug or a Feature? *Trends Neurosci* **43**, 363-372, doi:10.1016/j.tins.2020.03.009 (2020).

647

648 6 Euler, T., Haverkamp, S., Schubert, T. & Baden, T. Retinal bipolar cells:  
649 elementary building blocks of vision. *Nat Rev Neurosci* **15**, 507-519,  
doi:10.1038/nrn3783 (2014).

650

651 7 Wadiche, J. I. & Jahr, C. E. Multivesicular release at climbing fiber-Purkinje cell  
synapses. *Neuron* **32**, 301-313 (2001).

652

653 8 Glowatzki, E. & Fuchs, P. A. Transmitter release at the hair cell ribbon synapse.  
*Nat Neurosci* **5**, 147-154, doi:10.1038/nn796 (2002).

654

655 9 Christie, J. M. & Jahr, C. E. Multivesicular release at Schaffer collateral-CA1  
656 hippocampal synapses. *The Journal of neuroscience : the official journal of the Society*  
*for Neuroscience* **26**, 210-216, doi:10.1523/JNEUROSCI.4307-05.2006 (2006).

657

658 10 Higley, M. J., Soler-Llavina, G. J. & Sabatini, B. L. Cholinergic modulation of  
659 multivesicular release regulates striatal synaptic potency and integration. *Nature*  
*neuroscience* **12**, 1121-1128 (2009).

660

661 11 Holler, S., Köstinger, G., Martin, K. A. C., Schuhknecht, G. F. P. & Stratford, K. J.  
662 Structure and function of a neocortical synapse. *Nature* **591**, 111-116,  
doi:10.1038/s41586-020-03134-2 (2021).

663

664 12 Ribelayga, C., Cao, Y. & Mangel, S. C. The circadian clock in the retina controls  
rod-cone coupling. *Neuron* **59**, 790-801, doi:10.1016/j.neuron.2008.07.017 (2008).

665

666 13 Nie, K. *et al.* Effects of circadian clock protein Per1b on zebrafish visual functions.  
*Chronobiology international* **35**, 160-168 (2018).

667

668 14 Li, L. Circadian Vision in Zebrafish: From Molecule to Cell and from Neural Network  
to Behavior. *J Biol Rhythms* **34**, 451-462, doi:10.1177/0748730419863917 (2019).

669

670 15 Zang, J. *et al.* Circadian Regulation of Vertebrate Cone Photoreceptor Function.  
*bioRxiv*, 2021.2005.2005.442714, doi:10.1101/2021.05.05.442714 (2021).

671

672 16 Nikolaev, A., Leung, K. M., Odermatt, B. & Lagnado, L. Synaptic mechanisms of  
673 adaptation and sensitization in the retina. *Nat Neurosci* **16**, 934-941,  
doi:10.1038/nn.3408 (2013).

- 674 17 Zimmermann, M. J. Y. *et al.* Zebrafish Differentially Process Color across Visual  
675 Space to Match Natural Scenes. *Curr Biol* **28**, 2018-2032.e2015,  
676 doi:10.1016/j.cub.2018.04.075 (2018).
- 677 18 Franke, K. *et al.* Inhibition decorrelates visual feature representations in the inner  
678 retina. *Nature* **542**, 439-444, doi:10.1038/nature21394 (2017).
- 679 19 Johnston, J. *et al.* A Retinal Circuit Generating a Dynamic Predictive Code for  
680 Oriented Features. *Neuron* **102**, 1211-1222 e1213, doi:10.1016/j.neuron.2019.04.002  
681 (2019).
- 682 20 Matsumoto, A. *et al.* Direction selectivity in retinal bipolar cell axon terminals.  
683 *Neuron* (2021).
- 684 21 Lagnado, L. & Schmitz, F. Ribbon Synapses and Visual Processing in the Retina.  
685 *Annu Rev Vis Sci* **1**, 235-262, doi:10.1146/annurev-vision-082114-035709 (2015).
- 686 22 Singer, J. H., Lassoova, L., Vardi, N. & Diamond, J. S. Coordinated multivesicular  
687 release at a mammalian ribbon synapse. *Nat Neurosci* **7**, 826-833, doi:10.1038/nn1280  
688 (2004).
- 689 23 James, B., Darnet, L., Moya-Diaz, J., Seibel, S. H. & Lagnado, L. An amplitude  
690 code transmits information at a visual synapse. *Nat Neurosci* **22**, 1140-1147,  
691 doi:10.1038/s41593-019-0403-6 (2019).
- 692 24 Auger, C., Kondo, S. & Marty, A. Multivesicular release at single functional synaptic  
693 sites in cerebellar stellate and basket cells. *The Journal of neuroscience : the official*  
694 *journal of the Society for Neuroscience* **18**, 4532-4547 (1998).
- 695 25 Dreosti, E., Odermatt, B., Dorostkar, M. M. & Lagnado, L. A genetically encoded  
696 reporter of synaptic activity in vivo. *Nat Methods* **6**, 883-889, doi:10.1038/nmeth.1399  
697 (2009).
- 698 26 Marvin, J. S. *et al.* An optimized fluorescent probe for visualizing glutamate  
699 neurotransmission. *Nat Methods* **10**, 162-170, doi:10.1038/nmeth.2333 (2013).
- 700 27 Jackson, C. R. *et al.* Retinal dopamine mediates multiple dimensions of light-  
701 adapted vision. *The Journal of neuroscience : the official journal of the Society for*  
702 *Neuroscience* **32**, 9359-9368, doi:10.1523/JNEUROSCI.0711-12.2012 (2012).
- 703 28 Esposti, F., Johnston, J., Rosa, J. M., Leung, K. M. & Lagnado, L. Olfactory  
704 stimulation selectively modulates the OFF pathway in the retina of zebrafish. *Neuron*  
705 **79**, 97-110, doi:10.1016/j.neuron.2013.05.001 (2013).
- 706 29 Roy, S. & Field, G. D. Dopaminergic modulation of retinal processing from starlight  
707 to sunlight. *J Pharmacol Sci* **140**, 86-93, doi:10.1016/j.jphs.2019.03.006 (2019).
- 708 30 Shannon, C. A Mathematical Theory of Communication. *Bell System Technical*  
709 *Journal* **27**, 379-423 (1948).
- 710 31 Faisal, A. A., Selen, L. P. & Wolpert, D. M. Noise in the nervous system. *Nat Rev*  
711 *Neurosci* **9**, 292-303, doi:10.1038/nrn2258 (2008).

- 712 32 London, M., Roth, A., Beeren, L., Hausser, M. & Latham, P. E. Sensitivity to  
713 perturbations in vivo implies high noise and suggests rate coding in cortex. *Nature* **466**,  
714 123-127, doi:10.1038/nature09086 (2010).
- 715 33 Churchland, M. M. *et al.* Stimulus onset quenches neural variability: a widespread  
716 cortical phenomenon. *Nature Neuroscience* **13**, 369-378, doi:10.1038/nn.2501 (2010).
- 717 34 Fairhall, A. L. Whither variability? *Nature Neuroscience* **22**, 329-330,  
718 doi:10.1038/s41593-019-0344-0 (2019).
- 719 35 Berry, M. J., Warland, D. K. & Meister, M. The structure and precision of retinal  
720 spike trains. *Proceedings of the National Academy of Sciences* **94**, 5411,  
721 doi:10.1073/pnas.94.10.5411 (1997).
- 722 36 Rathbun, D. L., Warland, D. K. & Usrey, W. M. Spike timing and information  
723 transmission at retinogeniculate synapses. *Journal of Neuroscience* **30**, 13558-13566  
724 (2010).
- 725 37 Cui, Y., Wang, Y. V., Park, S. J. H., Demb, J. B. & Butts, D. A. Divisive suppression  
726 explains high-precision firing and contrast adaptation in retinal ganglion cells. *eLife* **5**,  
727 e19460, doi:10.7554/eLife.19460 (2016).
- 728 38 Freed, M. A. Quantal encoding of information in a retinal ganglion cell. *J*  
729 *Neurophysiol* **94**, 1048-1056, doi:10.1152/jn.01276.2004 (2005).
- 730 39 Choi, S. Y. *et al.* Encoding light intensity by the cone photoreceptor synapse.  
731 *Neuron* **48**, 555-562, doi:10.1016/j.neuron.2005.09.011 (2005).
- 732 40 Odermatt, B., Nikolaev, A. & Lagnado, L. Encoding of luminance and contrast by  
733 linear and nonlinear synapses in the retina. *Neuron* **73**, 758-773,  
734 doi:10.1016/j.neuron.2011.12.023 (2012).
- 735 41 Stone, J. V. *Principles of Neural Information Theory: Computational Neuroscience*  
736 *and Metabolic Efficiency* (Sebtel Press, 2018).
- 737 42 Schultz, S. R. Signal-to-noise ratio in neuroscience. *Scholarpedia* **2**, 2046 (2007).
- 738 43 Borst, A. & Theunissen, F. E. Information theory and neural coding. *Nat Neurosci*  
739 **2**, 947-957, doi:10.1038/14731 (1999).
- 740 44 DeWeese, M. R. & Meister, M. How to measure the information gained from one  
741 symbol. *Network* **10**, 325-340 (1999).
- 742 45 Laughlin, S. B. Energy as a constraint on the coding and processing of sensory  
743 information. *Curr Opin Neurobiol* **11**, 475-480, doi:10.1016/s0959-4388(00)00237-3  
744 (2001).
- 745 46 Koch, K. *et al.* How much the eye tells the brain. *Curr Biol* **16**, 1428-1434,  
746 doi:10.1016/j.cub.2006.05.056 (2006).
- 747 47 Oertner, T. G., Sabatini, B. L., Nimchinsky, E. A. & Svoboda, K. Facilitation at  
748 single synapses probed with optical quantal analysis. *Nature neuroscience* **5**, 657-664  
749 (2002).

- 750 48 Chalifoux, J. R. & Carter, A. G. GABAB receptors modulate NMDA receptor  
751 calcium signals in dendritic spines. *Neuron* **66**, 101-113 (2010).
- 752 49 Pologruto, T. A., Sabatini, B. L. & Svoboda, K. ScanImage: flexible software for  
753 operating laser scanning microscopes. *Biomed Eng Online* **2**, 13, doi:10.1186/1475-  
754 925X-2-13 (2003).
- 755 50 de Ruyter van Steveninck, R. R., Lewen, G. D., Strong, S. P., Koberle, R. & Bialek,  
756 W. Reproducibility and variability in neural spike trains. *Science* **275**, 1805-1808,  
757 doi:10.1126/science.275.5307.1805 (1997).
- 758 51 Pola, G., Schultz, S. R, Petersen, R. S & Panzeri, S. in *Neuroscience Databases:*  
759 *A Practical Guide* (Springer, Boston, MA, 2003).  
760
